# Supplementary material for: Use of domesticated pigs by Mesolithic hunter-gatherers in northwestern Europe
Source: PubMed Central journal article supplement — Nat Commun. 2013 Aug 27;4:2348. doi: 10.1038/ncomms3348 (PMC3903269; doi:10.1038/ncomms3348), 2013-08-27
Supplement: ncomms3348-s1.pdf [file ncomms3348-s1.pdf]

## SUPPLEMENTARY TABLES

**Supplementary Table S1: Summary of previous claims for Mesolithic domestic animals in northern Europe**

| Country          | Site (dating)                                                | Claim                                                                                                    | Basis for questioning evidence                                                                                                                                                                                                                                                              | Earliest proven appearance of domesticates                        |
|------------------|--------------------------------------------------------------|----------------------------------------------------------------------------------------------------------|---------------------------------------------------------------------------------------------------------------------------------------------------------------------------------------------------------------------------------------------------------------------------------------------|-------------------------------------------------------------------|
| Denmark          | Dyrholm I (Classic Ertebølle)                                | Domestic cattle, based on lower M3s <sup>57,58</sup>                                                     | Re-evaluation <sup>59</sup> based on an increasing number of aurochs reference skeletons (overlap between small female aurochs and domestic cattle (sexual dimorphism))                                                                                                                     | 16 domestic cattle from Åkonge (3900 <i>cal</i> BC) <sup>61</sup> |
|                  | Lollikhuse (Late Mesolithic / 5 <sup>th</sup> millennium BC) | Domestic cattle, based on a single bone <sup>60</sup>                                                    | Identification of remains uncertain <sup>6</sup>                                                                                                                                                                                                                                            |                                                                   |
| Northern Germany | Rosenhof (late Ertebølle)                                    | Domestic cattle, based on a mandibular M3, scapula (fused) and a distal metacarpal (fused) <sup>62</sup> | M3; sexual dimorphism <sup>63,64</sup><br>Scapula; dimension is subject to very considerable growth and an early fusion in life (thus juvenile aurochs)<br>Metacarpal; isotope ratio in the range of contemporaneous aurochs <sup>65</sup> , aDNA matches with native aurochs <sup>22</sup> | Domestic cattle at Wangels ~4100 <i>cal</i> BC <sup>3,68</sup>    |
|                  |                                                              | Domestic pig, based on a scapula (fusion unknown) <sup>62</sup>                                          | Dimension is subject to very considerable growth <sup>18</sup>                                                                                                                                                                                                                              |                                                                   |
|                  | Bregendtwendt-Förstermoor (Late Ertebølle)                   | Domestic cattle, based on a scapula (fusion unknown) <sup>66</sup>                                       | Dimension is subject to very considerable growth <sup>18</sup>                                                                                                                                                                                                                              |                                                                   |
|                  | Lietzow-Buddelin (Late Ertebølle)                            | Two caprine elements <sup>67</sup>                                                                       | Elements may be intrusive from overlying layers <sup>67</sup>                                                                                                                                                                                                                               |                                                                   |
| Poland           | Dęby (6 <sup>th</sup> millennium BC)                         | Domestic goats <sup>69</sup>                                                                             | No longer accepted, new dating of the stratigraphy <sup>70</sup>                                                                                                                                                                                                                            | Domestic cattle at Dąbki ~4200 <i>cal</i> BC <sup>71</sup>        |

|                                                                             |                                                                                  |                                                                                                                |                                                                                                                                                                                                                                                                                 |                                                                         |
|-----------------------------------------------------------------------------|----------------------------------------------------------------------------------|----------------------------------------------------------------------------------------------------------------|---------------------------------------------------------------------------------------------------------------------------------------------------------------------------------------------------------------------------------------------------------------------------------|-------------------------------------------------------------------------|
|                                                                             | Dąbki (Late Mesolithic)                                                          | Domestic cattle and pig <sup>69</sup>                                                                          | No metrical evidence offered, re-evaluation suggests domestic cattle appear ~4200 <i>cal</i> BC <sup>71</sup>                                                                                                                                                                   |                                                                         |
| Netherlands                                                                 | Hardinxveld-Giessendam De Bruin (Mesolithic 4700 <i>cal</i> BC)                  | Layer 2: three domestic animals<br>Layer 3: 28 domestic animals (15 cattle, 3 pigs, 10 caprines) <sup>72</sup> | Cattle: none is directly dated, no metrical data no fusion points (carpals), post fusion growth (scapula, pelvis) or highly variable (phalanges)<br>pig: none is directly dated, no metrical data<br>caprine: none is directly dated, no metrical data <sup>5</sup>             | Domestic animals from Swifterbant S3 (4100 <i>cal</i> BC) <sup>75</sup> |
|                                                                             | Brandwijk-Kerkhof (Mesolithic 4700 <i>cal</i> BC)                                | Eight domestic cattle bones from layer A <sup>73</sup>                                                         | Layer A dated to 4900-4100 <i>cal</i> BC, was identified afterwards on the basis of ceramic temper, animal bones are not at the bottom of the layer <sup>73</sup> .<br>No details on the bones, most are burnt, calcined, heavily weathered or poorly preserved <sup>73</sup> . |                                                                         |
|                                                                             |                                                                                  | 79 domestic pigs from layer A <sup>73</sup>                                                                    | The majority of the bones are heavily burnt <sup>73</sup> ; no useful measurements presented <sup>5</sup>                                                                                                                                                                       |                                                                         |
|                                                                             | Schockland P14 (layer 30 (4500 <i>cal</i> BC); layer 40/50 (4000 <i>cal</i> BC)) | From layer 50, two pig upper M3s are claimed as domestic <sup>74</sup>                                         | None is directly dated <sup>5,74</sup>                                                                                                                                                                                                                                          |                                                                         |
| Two caprine fragments (second phalanx, scapula) from layer 30 <sup>74</sup> |                                                                                  | None is directly dated <sup>5,74</sup>                                                                         |                                                                                                                                                                                                                                                                                 |                                                                         |
| Ireland                                                                     | Ferriter`s Cove (~4300 <i>cal</i> BC)                                            | Domestic cattle, two specimens <sup>76,77</sup>                                                                | None                                                                                                                                                                                                                                                                            | Domestic cattle at Ferriter`s Cove (~4300 <i>cal</i> BC) and            |
|                                                                             | Kilgreany Cave (~4300 <i>cal</i> BC)                                             | Domestic cattle, one specimen <sup>76,77</sup>                                                                 | None                                                                                                                                                                                                                                                                            | Kilgreany Cave (~4300 <i>cal</i> BC) <sup>76,77</sup>                   |

**Supplementary Table S2. Primers used to amplify the diagnostic 80-bp fragment of *Sus* mtDNA**

| <b>Set</b> | <b>Primer name</b> | <b>Sequence</b>          | <b>Fragment size</b> |
|------------|--------------------|--------------------------|----------------------|
| ANC1       | ANC-F1*            | CTTTAAAACAAAAAACCATAAAAA | 128 bp               |
|            | ANC-R1*            | TTAATGCACGACGTACATAGG    |                      |
| PIG1       | PIG1FOR*           | CATTCCATTCGTATGCAAACC    | 173 bp               |
|            | ANC-R1*            | TTAATGCACGACGTACATAGG    |                      |

All primers are listed in the 5' to 3' direction.

\*Primers were designed and reported by Larson et al. 2007.

**Supplementary Table S3. Singleplex PCR components used in Kiel for mtDNA analysis**

| <b>Component</b>        | <b>Volume/concentration</b> |
|-------------------------|-----------------------------|
| MgCl <sub>2</sub> 50 mM | 0.75 µl                     |
| 10 x buffer             | 2.5 µl                      |
| dNTPs                   | 2 µl/each 200 µmol dNTP     |
| Taq polymerase (5 U/µl) | 0.2 µl                      |
| Primer_f                | 0.75 µl / 0.4 µM            |
| Primer_r                | 0.75 µl / 0.4 µM            |
| DMSO                    | 1 µl                        |
| DNA extract             | 1-5 µl                      |
| ddH <sub>2</sub> O      | 12.05 –16.05 µl             |

**Supplementary Table S4. Mutations in the *MC1R* gene causing coat color variation**

| Codon                                             | 4        | 17                                       | 21       | 22                        | 102                      | 117      | 121                                                      | 122      | 124a             | 124b                             | 164              | 166      | 243      | 301              |
|---------------------------------------------------|----------|------------------------------------------|----------|---------------------------|--------------------------|----------|----------------------------------------------------------|----------|------------------|----------------------------------|------------------|----------|----------|------------------|
| Wild-type                                         | T        | G                                        | G        | -                         | T                        | G        | T                                                        | G        | C                | G                                | C                | C        | G        | C                |
| Mutation and the associated <i>MC1R</i> -genotype | C<br>103 | A<br>104/<br>105/<br>201/<br>202/<br>203 | A<br>502 | CC<br>501/<br>502/<br>503 | C<br>201/<br>202/<br>203 | A<br>105 | C<br>102/<br>103/<br>104/<br>105/<br>201/<br>202/<br>203 | A<br>202 | T<br>104/<br>203 | A<br>301/<br>501/<br>502/<br>503 | T<br>401/<br>503 | T<br>503 | A<br>401 | T<br>104/<br>105 |

Nomenclature follows Fang et al. 2009.

**Supplementary Table S5. Primers used to amplify six fragments of the *MC1R* gene**

| Set   | Primer name | Sequence             | Fragment size |
|-------|-------------|----------------------|---------------|
| MC1R1 | MC1R_1f     | CACCTCTGGGAGCCATGA   | 171 bp        |
|       | MC1R_1r     | CGTCTGGTTGGTCTGGTTG  |               |
| MC1R2 | MC1R_2f     | ACCTGCTGGTGAGCGTGAG  | 150 bp        |
|       | MC1R_2r     | AGCAGAGGCTGGACCCAT   |               |
| MC1R3 | MC1R_3f     | CGCTACCACAGCATCGTG   | 120 bp        |
|       | MC1R_3r     | GATGAAGAGGGTGCTGGAGA |               |
| MC1R4 | MC1R_4f     | GCGGTACTGTACGTCCACAT | 154 bp        |
|       | MC1R_4r     | CCCAGCAGAGGAGGAAGAC  |               |
| MC1R5 | MC1R_5f     | CTCCACAAGACGCAGCAC   | 94 bp         |
|       | MC1R_5r     | CCCAGCAGAGGAGGAAGAC  |               |
| MC1R6 | MC1R_6f     | TCGTCATCTGCAACTCCATC | 90 bp         |
|       | MC1R_6r     | AGCACTGCAGCACCTCCT   |               |

All primers are listed 5' to 3'.

**Supplementary Table S6. Singleplex and multiplex PCR components used for *MC1R* analysis**

| Component               | Volume/concentration                                                   |                       |
|-------------------------|------------------------------------------------------------------------|-----------------------|
|                         | singleplex                                                             | multiplex             |
| MgCl <sub>2</sub> 50 mM | 0.75 µl                                                                | 0.75 µl               |
| 10 x buffer             | 2.5 µl                                                                 | 2.5 µl                |
| dNTPs                   | 2 µl/each 200 µmol dATP, dCTRP, dTTP, 150 µmol dc7-GTP and 50 µmol GTP | 2 µl                  |
| Taq polymerase (5 U/µl) | 0.2 µl                                                                 | 0.2 µl                |
| Primer_f                | 0.75 µl / 0.4 µM                                                       | each 0.75 µl / 0.4 µM |
| Primer_r                | 0.75 µl / 0.4 µM                                                       | each 0.75 µl / 0.4 µM |
| DMSO                    | 1 µl                                                                   | 1 µl                  |
| DNA extract             | 1-5 µl                                                                 | 1-5 µl                |
| ddH <sub>2</sub> O      | 12.05 –16.05 µl                                                        | 4.55 –8.55 µl         |

**Supplementary Table S7. SBE multiplex primers used for *MC1R* analysis, amplicon sizes and variants**

|             | SBE primer name* | Sequence                                                | Fragment size | Wild-type | Mutation |
|-------------|------------------|---------------------------------------------------------|---------------|-----------|----------|
| Multiplex 1 | 21               | CTCCGCRCCCCAGCC                                         | 16            | G         | A        |
|             | 121              | CARCAGCTGGACAA                                          | 14            | T         | C        |
|             | 117              | GACTGACTGACTCAGGCCGCCGTGGTGCA                           | 29            | G         | A        |
|             | 4                | GACTGACTGACTGGGACGATGCCCGTGCT                           | 29            | T         | C        |
|             | 124A             | GACTGACTGACTGACTGACTGACTCGCAGATGAGCAC                   | 37            | G         | A        |
|             | 124B             | GACTGACTGACTGACTGACTGACTCGCAGATGAGCACRT                 | 39            | C         | T        |
|             | 166              | GACTGACTGACTGACTGACTGACTGACTGATGGCCGCGATGGCCC           | 45            | C         | T        |
|             | 301              | GACTGACTGACTGACTGACTGACTGACTGACTGACTGACTTGGACCCCTCATCTA | 48            | C         | T        |
| Multiplex 2 | 22               | CCCAGCCRCCCCCG                                          | 15+17         | -         | +CC      |
|             | 17               | GGGGGYGGCTGGGGG                                         | 15            | G         | A        |
|             | 102              | GACTGACTGACTGAGACGGCCGTGCTGC                            | 28            | T         | C        |
|             | 122              | AAAAAAAAAAAAAAAAAACARCAGCTGGACAAY                       | 35            | G         | A        |
|             | 164              | GACTGACTGACTGACTGACTGACTGTGACGCTGCCCGCG                 | 40            | C         | T        |
|             | 243              | GACTGACTGACTGACTGACTGACTGACTTGC GGCTCAAGGGC             | 43            | G         | A        |

\*SBE primer name corresponds to codon number.

**Supplementary Table S8. SBE reaction components and concentrations used for *MC1R* analysis**

| Multiplex 1     |     |                       | Multiplex 2     |     |                       | SBE-Multiplex 1                      | SBE-Multiplex 2                      |
|-----------------|-----|-----------------------|-----------------|-----|-----------------------|--------------------------------------|--------------------------------------|
| SBE primer name | μM  | Volume for one sample | SBE primer name | μM  | Volume for one sample |                                      |                                      |
| 21              | 0.2 | 0.2 μl                | 22              | 0.8 | 0.8 μl                | 5μl SNaPshot multiplex mix           | 5 μl SNaPshot multiplex mix          |
| 121             | 0.1 | 0.1 μl                | 17              | 0.8 | 0.8 μl                |                                      |                                      |
| 117             | 0.8 | 0.8 μl                | 102             | 0.1 | 0.1 μl                | 1-3 μl cleaned multiplex-PCR product | 1-3 μl cleaned multiplex PCR product |
| 4               | 0.1 | 0.1 μl                | 122             | 0.4 | 0.4 μl                |                                      |                                      |
| 124A            | 0.1 | 0.1 μl                | 164             | 0.4 | 0.4 μl                | 2 μl SBE mix                         | 2.6 μl SBE mix                       |
| 124B            | 0.1 | 0.1 μl                | 243             | 0.1 | 0.1 μl                |                                      |                                      |
| 166             | 0.4 | 0.4 μl                |                 |     | 2.6 μl                | 0-2 μl ddH <sub>2</sub> O            | 0-2 μl ddH <sub>2</sub> O            |
| 301             | 0.2 | 0.2 μl                |                 |     |                       |                                      |                                      |
| <b>Sum</b>      |     | 2 μl                  |                 |     | 2.6 μl                | 10 μl                                | 10-10.6 μl                           |

**Supplementary Table S9. Singleplex PCR components used in Durham for mtDNA analysis**

| <b>Component</b>                | <b>Volume/concentration</b> |
|---------------------------------|-----------------------------|
| Taq GOLD                        | 1.25 U                      |
| Gold buffer                     | 1 x                         |
| MgCl <sub>2</sub>               | 2.5 mM                      |
| BSA (Bovine Serum Albumin)      | 0.5 g/μl                    |
| each dNTP                       | 200 μM                      |
| each forward and reverse primer | 0.8 μM                      |
| aDNA extract                    | 2 μl                        |
| ddH <sub>2</sub> O              | 12.05 –16.05 μl             |

**Supplementary Table S10. Sample size of modern reference specimens for GMM and traditional metric analyses**

| <b>Skeletal element</b> | <b>Domestic pig</b> | <b>Wild boar</b> |
|-------------------------|---------------------|------------------|
| Upper M2                | 59                  | 68               |
| Lower M2                | 53                  | 73               |
| Upper M3                | 40                  | 32               |
| Lower M3                | 42                  | 33               |

## SUPPLEMENTARY REFERENCES

57. Degerbøl, M. Et knoglemateriale fra Dyrholm-bopladsen, en ældre stenalder køkkenmødding [Bone material from Dyrholm-camp, an early Neolithic kitchen midden]. Dyrholm, En Stenalderboplads på Djursland [Dyrholm, a stone age settlement from Jutland] (eds Mathiassen, T., Degerbøl, M. & Troels-Smith J) Arkæologisk-Kunsthistorisk Skrifter 1, 77-136 (Det Kongelige Dansk Videnskabernes Selskab, Copenhagen, 1942). Danish
58. Degerbøl, M. Prehistoric cattle in Denmark and adjacent areas. Man and cattle (eds Mourant, A. E. & Zeuner, F. E.) Occasional Paper 18, 68-79 (Royal Anthropological Institute, London, 1963).
59. Degerbøl, M. & Fredskild, B. The Urus (*Bos primigenius* Bojanus) and Neolithic domesticated cattle (*Bos taurus domesticus* Linné). Denmark, Det Kongelige Dansk Videnskabernes Selskab 17, 1 (Biologiske Skrifter, Copenhagen, 1970).
60. Sørensen, S. A. Lollikhuse, a site from the transitional phase between the Mesolithic and Neolithic in Denmark. Mesolithic Horizons (eds McCartan, S. B., Schulting, R., Warren, G. & Woodman, P.) 541-547 (Oxbow Books, Oxford, 2009).
61. Gotfredsen, A. B. En rekonstruktion af palæomiljøet omkring tre senmesolitiske bopladser i Store Åmose, Vestsjælland - baseret på pattedyr - og fugleknogler [A reconstruction of the palaeo-environment of three Late Mesolithic settlements in Great Åmose, Zealand - based on mammalian - and bird bones]. Geologisk Tidsskrift 2, 92-103 (1998). Danish

62. Nobis, G. Zur Fauna des ellerbekzeitlichen Wohnplatzes Rosenhof in Ostholstein [The fauna of the Ellerbek campsite of Rosenhof, Ostholstein]. *Schriften des Naturwissenschaftlichen Vereins für Schleswig-Holstein* 45, 5-30 (1975). German
63. Rowley-Conwy, P. The origins of agriculture in Denmark: a review of some theories. *J Danish Arch* 4, 188-195 (1985).
64. Rowley-Conwy, P. Wild or domestic? On the evidence for the earliest domestic cattle and pigs in South Scandinavia and Iberia. *Int J Osteoarch* 5, 115-126 (1995).
65. Noe-Nygaard, N., Price, T. D. & Hede, S. U. Diet of aurochs and early cattle in southern Scandinavia: evidence from  $^{15}\text{N}$  and  $^{13}\text{C}$  stable isotopes. *J Arch Sci* 32, 855-871 (2005).
66. Nobis, G. Die Tierreste prähistorischer Siedlungen aus dem Satrupholmer Moor (Schleswig-Holstein) [Animal remains from the prehistoric settlements Satrupholmer Moor (Schleswig-Holstein)]. *Zeitschrift für Tierzucht und Zuchtungsbiologie* 77, 16-30 (1962). German
67. Teichert, L. Das Tierknochenmaterial der erdeböllezeitlichen Fundorte von Ralswiek-Augustenhof und Lietzow-Buddelin, Kr. Rügen [Animal bones from the Ertebølle sites Ralswiek-Augustenhof and Lietzow-Buddelin, Kr. Rügen]. *Veröffentlichungen des Museums für Ur- und Frühgeschichte Potsdam* 23, 59-74 (1989). German
68. Price, T. D. & Noe-Nygaard, N. Early domestic cattle in southern Scandinavia. From *Bann Flakes to Bushmills* (eds Finlay, N., McCartan, S., Milner, N. & Wickham-Jones, C.) 198-210 (Oxbow Books, Oxford, 2009).
69. Ilkiewicz, J. From studies on cultures of the 4th millennium B.C. in the central part of the Polish coastal area. *Przeglad Archeologiczny* 36, 17-55 (1989).

70. Domanska, L. Interactions between the late Mesolithic hunter-gatherers and farming communities in northern Poland. *Mesolithic on the move* (eds Larsson, L., Kindgren, H., Knutsson, K., Loeffler, D. & Åkerlund, A.) 588-591 (Oxbow Books, Oxford, 2003).
71. Kabacinski, J., Heinrich, D. & Terberger, T. Dąbki revisited: new evidence on the question of the earliest cattle use in Pomerania. *Mesolithic Horizons vol. II* (eds McCartan, S. B., Schulting, R., Warren, G. & Woodman, P.) 548-555 (Oxbow Book, Oxford, 2009).
72. Oversteegen, J. F. S. et al. Zoogdieren, vogels, reptielen. Hardinxveld-Giessendam De Bruin: een kampplaats uit het Laat-Mesolithicum en het begin van de Swifterbant-cultuur (5500-4450 v. Chr.) [Mammals, birds, reptiles. Hardinxveld-Giessendam De Bruin: a campsite from the Late Mesolithic and early Swifterbant culture]. Rijksdienst voor het Oudheidkundig Bodemonderzoek, Amersfoort [National Service for Archaeological Heritage, Amersfoort] (ed Louwe Kooijmans, L.) *Rapportage Archeologische Monumentenzorg* 88, 209-297 (2001). Dutch
73. Gehasse, E. F. *Ecologisch-Archeologisch Onderzoek van het Neolithicum en de vroege Bronstijd in de Noordoostpolder met de Nadruk op Vindplaats P14* (PhD thesis, University of Amsterdam, 1995).
74. Robeerst, A. *De Neolithische fauna van de Donk het Kerkhof bij Brandwijk, Alblasserwaard* (Internal report, Faculty of Archeology, Leiden University, 1995).
75. Cappers, R. T. J. & Raemaekers, D. C. M. Cereal cultivation at Swifterbant? Neolithic wetland farming on the North European Plain. *Curr Anthropol* 49, 385-402 (2008).
76. Woodman, P. C., Anderson, E. & Finlay, N. *Excavations at Ferriter's Cove, 1983-85: last foragers, first farmers in the Dingle Peninsula* (Bray, Wordwell, 1999).

77. Woodman, P. & McCarthy, M. Contemplating some awfully interesting vistas: importing cattle and red deer into prehistoric Ireland. Neolithic settlement in Ireland and western Britain, (eds Armit, I., Murphy, E., Nelis, E. & Simpson, D.) 31–39 (Oxbow Book, Oxford, 2003).
